# Supplementary material
Source: ML conference proceedings conference paper supplement (https://proceedings.neurips.cc/paper_files/paper/2020/hash/51311013e51adebc3c34d2cc591fefee-Abstract.html)
Supplement: Supplementary file [file 51311013e51adebc3c34d2cc591fefee-Supplemental.pdf]

## A Supplementary Material for Interior Point Solving for LP-based prediction+optimisation

### A.1 Solution of Newton Equation System of Eq. (11)

Here we discuss how we solve an equation system of Eq (11), for more detail you can refer to[4]. Consider the following system with a generic R.H.S-

$$\begin{bmatrix} -X^{-1}T & A^\top & -c \\ A & 0 & -b \\ -c^\top & b^\top & \kappa/\tau \end{bmatrix} \begin{bmatrix} x_1 \\ x_2 \\ x_3 \end{bmatrix} = \begin{bmatrix} r_1 \\ r_2 \\ r_3 \end{bmatrix} \quad (13)$$

If we write:

$$W \doteq \begin{bmatrix} -X^{-1}T & A^\top \\ A & 0 \end{bmatrix} \quad (14)$$

then, observe  $W$  is nonsingular provided  $A$  is full row rank. So it is possible to solve the following system of equations-

$$\begin{aligned} W \begin{bmatrix} p \\ q \end{bmatrix} &= \begin{bmatrix} c \\ b \end{bmatrix} \\ W \begin{bmatrix} u \\ v \end{bmatrix} &= \begin{bmatrix} r_1 \\ r_2 \end{bmatrix} \end{aligned} \quad (15)$$

Once we find  $p, q, u, v$  finally we compute  $x_3$  as:

$$x_3 = \frac{r_3 + u^\top c - v^\top b}{-c^\top p + b^\top q + \frac{\kappa}{\tau}}; \quad (16)$$

And finally

$$x_1 = u + px_3 \quad (17)$$

$$x_2 = v + qx_3 \quad (18)$$

To solve equation of the form

$$W \begin{bmatrix} u \\ v \end{bmatrix} = \begin{bmatrix} -X^{-1}T & A^\top \\ A & 0 \end{bmatrix} \begin{bmatrix} u \\ v \end{bmatrix} = \begin{bmatrix} r_1 \\ r_2 \end{bmatrix}$$

Notice we can reduce it to  $Mv = AT^{-1}Xr_1 + r_2$  (where  $M = AT^{-1}XA^\top$ ). As  $M$  is positive definite for a full row-rank  $A$ , we obtain  $v$  by Cholesky decomposition and finally  $u = T^{-1}X(A^\top v - r_1)$ .

### A.2 Differentiation of HSD formulation in Eq. (9)

We differentiate Eq. (9) with respect to  $c$ :

$$\begin{aligned} \frac{\partial(Ax)}{\partial c} - \frac{\partial(b\tau)}{\partial c} &= 0 \\ \frac{\partial(A^\top y)}{\partial c} + \frac{\partial t}{\partial c} - \frac{\partial(c\tau)}{\partial c} &= 0 \\ -\frac{\partial(c^\top x)}{\partial c} + \frac{\partial(b^\top y)}{\partial c} - \frac{\partial\kappa}{\partial c} &= 0 \\ \frac{\partial t}{\partial c} &= \frac{\partial(\lambda X^{-1}e)}{\partial c} \\ \frac{\partial\kappa}{\partial c} &= \frac{\partial(\frac{\lambda}{\tau})}{\partial c} \end{aligned} \quad (19)$$

Applying the product rule we can further rewrite this into:

$$\begin{aligned}
A \frac{\partial x}{\partial c} - b \frac{\partial \tau}{\partial c} &= 0 \\
A^\top \frac{\partial y}{\partial c} + \frac{\partial t}{\partial c} - (c \frac{\partial \tau}{\partial c} + \tau I) &= 0 \\
-(c^\top \frac{\partial x}{\partial c} + x^\top) + b^\top \frac{\partial y}{\partial c} - \frac{\partial \kappa}{\partial c} &= 0 \\
\frac{\partial t}{\partial c} &= -\lambda X^{-2} \frac{\partial x}{\partial c} \\
\frac{\partial \kappa}{\partial c} &= -\frac{\lambda}{\tau^2} \frac{\partial \tau}{\partial c}
\end{aligned} \tag{20}$$

Using  $t = \lambda X^{-1} e \leftrightarrow \lambda e = X T e$  we can rewrite the fourth equation to  $\frac{\partial t}{\partial c} = -X^{-1} T \frac{\partial x}{\partial c}$ . Similarly we use  $\kappa = \frac{\lambda}{\tau} \leftrightarrow \lambda = \kappa \times \tau$  and rewrite the fifth equation to  $\frac{\partial \kappa}{\partial c} = -\frac{\kappa}{\tau} \frac{\partial \tau}{\partial c}$ . Substituting these into the first three we obtain:

$$\begin{aligned}
A \frac{\partial x}{\partial c} - b \frac{\partial \tau}{\partial c} &= 0 \\
A^\top \frac{\partial y}{\partial c} - X^{-1} T \frac{\partial x}{\partial c} - c \frac{\partial \tau}{\partial c} - \tau I &= 0 \\
-c^\top \frac{\partial x}{\partial c} - x^\top + b^\top \frac{\partial y}{\partial c} + \frac{\kappa}{\tau} \frac{\partial \tau}{\partial c} &= 0
\end{aligned} \tag{21}$$

This formulation is written in matrix form in Eq. (12).

### A.3 LP formulation of the Experiments

#### A.3.1 Details on Knapsack formulation of real estate investments

In this problem,  $H$  is the set of housings under consideration. For each housing  $h$ ,  $c_h$  is the known construction cost of the housing and  $p_h$  is the (predicted) sales price. With the limited budget  $B$ , the constraint is

$$\sum_{h \in H} c_h x_h = B, \quad x_h \in 0, 1$$

where  $x_h$  is 1 only if the investor invests in housing  $h$ . The objective function is to maximize the following profit function

$$\max_{x_h} \sum_{h \in H} p_h x_h$$

#### A.3.2 Details on Energy-cost aware scheduling

In this problem  $J$  is the set of tasks to be scheduled on  $M$  number of machines maintaining resource requirement of  $R$  resources. The tasks must be scheduled over  $T$  set of equal length time periods. Each task  $j$  is specified by its duration  $d_j$ , earliest start time  $e_j$ , latest end time  $l_j$ , power usage  $p_j \cdot u_{jr}$  is the resource usage of task  $j$  for resource  $r$  and  $c_{mr}$  is the capacity of machine  $m$  for resource  $r$ . Let  $x_{jmt}$  be a binary variable which possesses 1 only if task  $j$  starts at time  $t$  on machine  $m$ . The first constraint ensures each task is scheduled and only once.

$$\sum_{m \in M} \sum_{t \in T} x_{jmt} = 1, \quad \forall j \in J$$

The next constraints ensure the task scheduling abides by earliest start time and latest end time constraints.

$$\begin{aligned}
x_{jmt} &= 0 \quad \forall j \in J \forall m \in M \forall t < e_j \\
x_{jmt} &= 0 \quad \forall j \in J \forall m \in M \forall t + d_j > l_j
\end{aligned}$$

Finally the resource requirement constraint:

$$\sum_{j \in J} \sum_{t-d_j < t' \leq t} x_{jmt'} u_{jr} \leq c_{mr}, \quad \forall m \in M \forall r \in R \forall t \in T$$

If  $c_t$  is the (predicted) energy price at time  $t$ , the objective is to minimize the energy cost of running all tasks, given by:

$$\min_{x_{jmt}} \sum_{j \in J} \sum_{m \in M} \sum_{t \in T} x_{jmt} \left( \sum_{t \leq t' < t + d_j} p_j c_{t'} \right)$$

### A.3.3 Details on Shortest path problem

In this problem, we consider a directed graph specified by node-set  $N$  and edge-set  $E$ . Let  $A$  be the  $|N| \times |E|$  incidence matrix, where for an edge  $e$  that goes from  $n_1$  to  $n_2$ , the  $(n_1, e)^{\text{th}}$  entry is 1 and  $(n_2, e)^{\text{th}}$  entry is -1 and the rest of entries in column  $e$  are 0. In order to, traverse from source node  $s$  to destination node  $d$ , the following constraint must be satisfied:

$$Ax = b$$

where  $x$  is  $|E|$  dimensional binary vector whose entries would be 1 only if corresponding edge is selected for traversal and  $b$  is  $|N|$  dimensional vector whose  $s^{\text{th}}$  entry is 1 and  $d^{\text{th}}$  entry is -1; and rest are 0. With respect to the (predicted) cost vector  $c \in \mathbb{R}^{|E|}$ , the objective is to minimize the cost

$$\min_x c^T x$$

## A.4 Additional Knapsack Experiments

This knapsack experiment is taken from [18], where the knapsack instances are created from the energy price dataset 15. The 48 half-hour slots are considered as 48 knapsack items and a random cost is assigned to each slot. The energy price of a slot is considered as the profit-value and the objective is to select a set of slots which maximizes the profit ensuring the total cost of the selected slots remains below a fixed budget. We also added the approach of Blackbox [25], which also deals with a combinatorial optimization problem with a linear objective.

| Budget | Two-stage | QPTL    | SPO     | Blackbox | IntOpt   |
|--------|-----------|---------|---------|----------|----------|
| 60     | 1042 (3)  | 579 (3) | 624 (3) | 533 (40) | 570 (58) |
| 120    | 1098 (5)  | 380 (2) | 425 (4) | 383 (14) | 406 (71) |

## A.5 Hyperparameters of the experiments <sup>2</sup>

### A.5.1 Knapsack formulation of real estate investments

| Model     | Hyperparameters*                                                                                                        |
|-----------|-------------------------------------------------------------------------------------------------------------------------|
| Two-stage | • optimizer: optim.Adam; learning rate: $10^{-3}$                                                                       |
| SPO       | • optimizer: optim.Adam; learning rate: $10^{-3}$                                                                       |
| QPTL      | • optimizer: optim.Adam; learning rate: $10^{-3}$ ; $\tau$ (quadratic regularizer): $10^{-5}$                           |
| IntOpt    | • optimizer: optim.Adam; learning rate: $10^{-2}$ ; $\lambda$ -cut-off: $10^{-4}$ ; damping factor $\alpha$ : $10^{-3}$ |

\* for all experiments embedding size: 7 number of layers:1,hidden layer size: 2

### A.5.2 Energy-cost aware scheduling

| Model     | Hyperparameters                                                                                           |
|-----------|-----------------------------------------------------------------------------------------------------------|
| Two-stage | • optimizer: optim.SGD; learning rate: 0.1                                                                |
| SPO       | • optimizer: optim.Adam; learning rate: 0.7                                                               |
| QPTL      | • optimizer: optim.Adam; learning rate: 0.1; $\tau$ (quadratic regularizer): $10^{-5}$                    |
| IntOpt    | • optimizer: optim.Adam; learning rate: 0.7; $\lambda$ -cut-off: 0.1; damping factor $\alpha$ : $10^{-6}$ |

<sup>2</sup>For more details refer to <https://github.com/JayMan91/NeurIPSIntopt>

### A.5.3 Shortest path problem

| Model     | Hyperparameters* |                                                                                                           |
|-----------|------------------|-----------------------------------------------------------------------------------------------------------|
| Two-stage | 1-layer          | • optimizer: optim.Adam; learning rate: 0.01                                                              |
|           | 2-layer          | • optimizer: optim.Adam; learning rate: $10^{-4}$                                                         |
| SPO       | 1-layer          | • optimizer: optim.Adam; learning rate: $10^{-3}$                                                         |
|           | 2-layer          | • optimizer: optim.Adam; learning rate: $10^{-3}$                                                         |
| QPTL      | 1-layer          | • optimizer: optim.Adam; learning rate: 0.7; $\tau$ (quadratic regularizer): $10^{-1}$                    |
|           | 2-layer          | • optimizer: optim.Adam; learning rate: 0.7; $\tau$ (quadratic regularizer): $10^{-1}$                    |
| IntOpt    | 1-layer          | • optimizer: optim.Adam; learning rate: 0.7; $\lambda$ -cut-off: 0.1; damping factor $\alpha$ : $10^{-2}$ |
|           | 2-layer          | • optimizer: optim.Adam; learning rate: 0.7; $\lambda$ -cut-off: 0.1; damping factor $\alpha$ : $10^{-2}$ |

\* for all experiments hidden layer size: 100

### A.6 Learning Curves

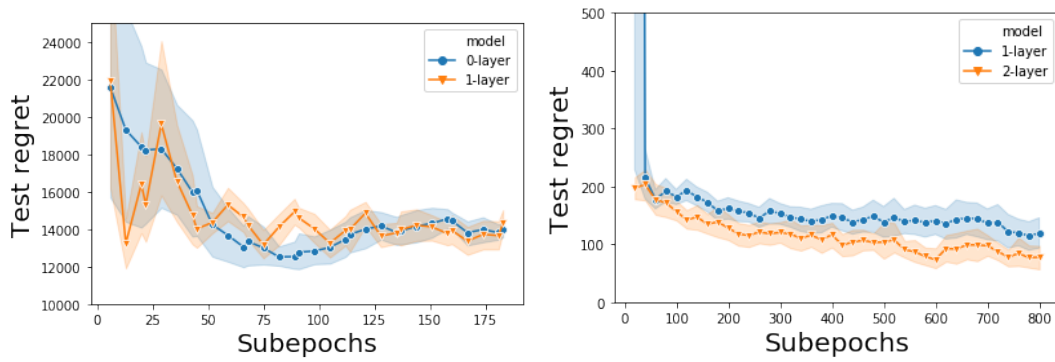

(a) Energy-cost aware scheduling

(b) Shortest path problem

Figure 2: IntOpt Learning Curve
